1

2 Cell Adhesion-Dependent Biphasic Axon Outgrowth Elucidated by  
3 Femtosecond Laser Impulse

4

5 Sohei Yamada<sup>a,b,\*</sup>, Kentarou Baba<sup>c</sup>, Naoyuki Inagaki<sup>c</sup>, Yoichiroh Hosokawa<sup>a,\*</sup>

6 <sup>a</sup> Division of Materials Science, Nara Institute of Science and Technology, 8916-5 Takayama,  
7 Ikoma, Nara 630-0192, Japan

8 <sup>b</sup> Graduate School of Science and Technology, Hirosaki University, 3 Bunkyo-Cho, Hirosaki,  
9 Aomori, 036-8561, Japan

10 <sup>c</sup> Division of Biological Science, Nara Institute of Science and Technology, 8916-5 Takayama,  
11 Ikoma, Nara 630-0192, Japan

12 \*Corresponding authors: Sohei Yamada, [so-yamada@bs.naist.jp](mailto:so-yamada@bs.naist.jp), and Yoichiroh Hosokawa,  
13 [hosokawa@ms.naist.jp](mailto:hosokawa@ms.naist.jp)

14 **Author Contributions:** S.Y. and Y.H. designed the research. N.I. supervised the research and  
15 contributed to presentation of the mechanism of axon outgrowth. S.Y. performed almost all  
16 experiments and data analysis. K.B. prepared primary cultured neurons. S.Y. and Y.H. wrote the  
17 article.

18

19 **Keywords:** Mechanobiology, Single cell manipulation, Laser application, Cell adhesion molecule,  
20 Actin

21

22

23 **Abstract**

24 Axon outgrowth is promoted by the mechanical coupling between the dynamic actin cytoskeleton  
25 and adhesive substrates via clutch and adhesion molecules in the axonal growth cone. In this study,  
26 we utilized a femtosecond laser-induced impulse to break the coupling between an axonal growth  
27 cone and an adhesive substrate, enabling us to evaluate the strength of the binding between  
28 proteins in the growth cone and a laminin substrate, and also determine the contribution of  
29 adhesion strength to axon outgrowth. We found that the adhesion strength of axonal L1 cell  
30 adhesion molecule (L1CAM)-laminin binding increased with the density of the laminin substrate. In  
31 addition, fluorescent speckle microscopy revealed that the retrograde flow of actin filaments in the  
32 axonal growth cone was dependent on the laminin density such that the flow speed reduced with  
33 increasing L1CAM-laminin binding. However, axon outgrowth did not increase monotonically with  
34 increased L1CAM-laminin binding but rather exhibited biphasic behavior, in which the outgrowth  
35 was suppressed by excessive L1CAM-laminin binding. Our quantitative evaluations of the adhesion  
36 strength suggest that the biphasic outgrowth is regulated by the balance between traction force  
37 and adhesion strength as a result of changes in the number of L1CAM-laminin interactions. These  
38 results imply that adhesion modulation is key to the regulation of axon guidance.

39 **Significance Statement**

40 There is a lack of a method to evaluate an adhesion strength of axonal growth cone. We evaluated  
41 the adhesion strength of axonal growth cones to a substrate by utilizing the force applied from a  
42 femtosecond laser impulse. This study shows that the adhesion strength between the growth cone  
43 and substrate is strengthened by L1CAM-laminin binding. Axon outgrowth did not increase  
44 monotonically with increased L1CAM-laminin binding but rather exhibited biphasic behavior,  
45 indicating that existence of suitable adhesion strength for axonal growth. Our findings suggest that  
46 the balance between growth cone adhesion strength and the traction force transmitted via  
47 cytoskeletal flow is a key factor in axon guidance.

48

## 49 **Introduction**

50 During neuronal development, axons elongate and form functional connections with other neurons  
51 and relevant cells. The growth cone located at the tip of an elongating axon senses chemical  
52 ligands in the external environment and undergoes directional migration (1-3). The traction force  
53 underlying growth cone migration is regulated by modulation of the coupling efficiency between  
54 actin filament (F-actin) retrograde flow and adhesive substrates via clutch and cell adhesion  
55 molecules (4, 5). Thus, the traction force transmitted to the substrate through the F-actin-adhesion  
56 coupling promotes axon outgrowth (1, 6).

57 We previously identified shootin1a and cortactin as clutch molecules for growth cone  
58 migration (7, 8). These molecules mediate the linkage between F-actin retrograde flow and the  
59 cytoplasmic domain of L1 cell adhesion molecule (L1CAM) (9). The extracellular domain of L1CAM  
60 interacts with adhesive ligands such as laminins in the extracellular matrix (10-12). L1CAM linked  
61 to the F-actin flow undergoes gripping (stop) and slipping (retrograde flow) on the substrate. It is  
62 the balance between these grip and slip states that regulates growth cone migration (12).

63 Our investigation focuses on the mechanism by which the interaction between L1CAM and  
64 laminin generates force. The challenge is to quantify key processes of growth cone migration, for  
65 which the adhesion strength via L1CAM-laminin binding is fundamental. However, it is difficult to  
66 quantify adhesion strength by conventional methods. For instance, the shear flow assay (13, 14) is  
67 not suitable for evaluating local adhesion at the interface between a growth cone and the substrate,  
68 whereas it is difficult to apply single-cell force spectroscopy (15, 16) to evaluate force without  
69 disturbing the adhesion required for axon outgrowth. We thus developed a method utilizing a  
70 femtosecond laser-induced impulsive force, which we used to quantify adhesions between  
71 leukocytes and endothelial cells, among epithelial cells, and between neurons and mast cells (17,  
72 18). A near-infrared femtosecond laser focused through a lens objective into a water solution  
73 generates stress and shock waves at the laser focal point. These waves propagate out spherically  
74 and act as an impulsive force on nearby cells. The force is localized to a diameter of 1–10  $\mu\text{m}$  and  
75 breaks intercellular adhesions at a single-cell resolution. We also developed a method to quantify  
76 the magnitude of the impulsive force by using atomic force microscopy (AFM) (19), enabling us to  
77 quantify the strength of intercellular adhesions on the basis of the force needed to break the  
78 connection (17, 18, 20).

79 In this work, we applied our previously established methods for generating laser-induced  
80 impulsive force (7, 12) to investigate the contribution of L1CAM-laminin binding to axon outgrowth.  
81 The specific interaction between laminin and L1CAM was confirmed by L1CAM knockdown in  
82 neurons. The strength of L1CAM-mediated adhesion was confirmed to be dependent on the density  
83 of laminin on the substrate. In addition, we used fluorescent speckle microscopy to observed the  
84 motions of F-actin and L1CAM in the axonal growth cone and then further assessed the contribution

85 of L1CAM-laminin binding to F-actin-substrate coupling. These experiments demonstrated that  
86 cytoskeletal dynamics in the axon growth cone are also dependent on the density of laminin on the  
87 substrate, revealing L1CAM-laminin binding as a mechanism for the regulation of axonal growth.  
88

## 89 **Results**

### 90 ***Adhesion breaking by a femtosecond laser-induced impulsive force***

91 Hippocampal neurons cultured for 3 days on a glass-bottom dish coated with 10  $\mu\text{g/ml}$  laminin were  
92 placed on an inverted microscope equipped with a femtosecond laser irradiation system. The  
93 single-shot femtosecond laser pulses were focused in the vicinity of axonal growth cones to assess  
94 the adhesion breaking threshold (Fig. 1A). The force was estimated by measuring the distance  
95 from the growth cone at which the laser pulse broke the adhesion to the substrate. For example,  
96 the laser with a pulse energy of 700 nJ was initially focused at a position 20  $\mu\text{m}$  from a targeted  
97 growth cone. After the first pulse irradiation, the focal point was moved closer to the target in 5  $\mu\text{m}$   
98 steps via an electrical stage until adhesion was broken; the distance between the growth cone and  
99 the final laser focal position was recorded.

100 Representative images before and after laser pulse irradiation are shown in Fig. 1B. The  
101 step-by-step approach of the laser pulse induces slight displacement of the growth cone (right  
102 image in Fig 1B; Video S1). This observation indicates that growth cones can be selectively  
103 detached from the substrate by the laser-induced impulsive force. We assessed whether the  
104 adhesion breaking process induced cell damage by using the fluorescent dye FM1-43 to mark sites  
105 of membrane repair (21). Significant increase in fluorescence did not occur when the laser was  
106 focused at the threshold distance for adhesion breaking (Fig. 1B), indicating that the impulsive force  
107 used to break growth cone adhesion does not damage the cell membrane.

108

### 109 ***Quantification of the adhesion breaking force***

110 We evaluated the threshold distance ( $R$ ) to break growth cone adhesion to the glass surface coated  
111 with 10  $\mu\text{g/ml}$  laminin at different laser pulse energies ( $L$ ) (Fig. 2A). As the impulsive force near the  
112 growth cone increases with  $L$ , the positive correlation between  $R$  and  $L$  indicates that  $R$  increases  
113 with an increasing impulsive force. We quantified the threshold for breaking the adhesion by using  
114 our previously established AFM method (22) in which an AFM cantilever replaces the tip of the  
115 growth cone and the impulsive force loaded on the cantilever is estimated from its bending

116 movement (17). From the estimation, the impulsive force  $F_0$  generated at the laser focal point is  
117 related to  $L$  as follows:

$$118 \quad F_0 = -0.003573L^2 + 0.644L - 1.5758. \quad [1]$$

119 Assuming that  $F_0$  propagates spherically in the vicinity of the laser focal point, the impulsive force  
120 as a unit of pressure ( $P$ ) is expressed by the following equation:

$$121 \quad P \text{ (kPa)} = \frac{F_0 \text{ (\mu N)} \times 10^3}{4 \pi R^2 \text{ (\mu m}^2\text{)}}. \quad [2]$$

122 Figure 2B shows a histogram for pressures calculated with Eq. [2] for each data point in  
123 Fig. 2A; the distribution was almost Gaussian. The mean value of the minimum pressure to break  
124 growth cone adhesion to a 10  $\mu\text{g/ml}$  laminin substrate was 4.5 kPa, comparable with the breaking  
125 threshold reported in our previous study (22).

126

### 127 ***Adhesion strength of the growth cone depends on L1CAM-laminin binding***

128 Fluorescent dye-conjugated laminin was used to assess the density of laminin on the substrate  
129 (Fig. 2C). The intensity of fluorescence ( $I$ ) increased with the concentration ( $C$ ) of laminin used to  
130 coat the glass until reaching saturation (Fig. 2D). This relationship is described by the following  
131 equation:

$$132 \quad I = I_{max}(1 - e^{-C/k}). \quad [3]$$

133 We assumed that (i)  $I$  is proportional to the number of laminin molecules attached to substrate  $N$ ;  
134 (ii)  $N$  has a maximum that determines  $I_{max}$ ; and (iii) the attachment rate  $k$  depends on the coating  
135 period (12 h in this experiment). In addition, we neglected the dissociation of laminin from the  
136 substrate because  $I$  was not significantly different after replacing the medium to one without laminin  
137 for the laser irradiation experiment. We defined the coverage rate ( $A$ ) of laminin as an index of  
138 laminin density on the substrate using the following equation:

$$139 \quad A = 1 - e^{-C/k}, \quad [4]$$

140 An  $A$  of 1 means that the laminin attached maximumly on the substrate.  $k$  was estimated by least-  
141 squares fitting with Eq. [3] and the data in Fig. 2D to obtain  $A$  on the substrate coated with laminin  
142 solution at concentration  $C$ .

143 The breaking threshold was evaluated according to  $A$  (red in Fig. 3) and compared with  
144 that determined after knockdown of L1CAM (blue in Fig. 3). The threshold increased with  $A$  for the  
145 control sample (Fig. 3B) but not for the L1CAM-knockdown samples, which maintained thresholds  
146 that matched those shown by controls at the low coverage rate ( $A = 0.01$ ). These findings indicate  
147 that the adhesion strength between the growth cone and substrate is strengthened by L1CAM-  
148 laminin binding. The offset threshold ( $\sim 2.5$  kPa) likely reflects laminin-independent adhesive  
149 interactions.

150 The nearly linear increase in adhesion strength with increasing  $A$  in the control samples  
151 (Fig. 3B), despite the variability as a result of individual differences among the cells, suggests that

152 the adhesion strength due to the L1CAM-laminin binding is proportional to the laminin density on  
153 the substrate. Furthermore, as the adhesion strength is integral to the individual binding strength  
154 between L1CAM and laminin, the adhesion strength reflects the number of L1CAM-laminin  
155 interactions. Thus, the increase in the breaking threshold with  $A$  may reflect the increase in the  
156 number of the L1CAM-laminin interactions that occur with increased laminin density. This  
157 relationship is presumably satisfied until the L1CAM sites available for binding are saturated.

158

### 159 ***L1CAM-laminin binding promotes F-actin-adhesion coupling***

160 The contribution of the laminin coverage rate  $A$  to F-actin-adhesion coupling was investigated next  
161 by visualizing F-actin retrograde flow and L1CAM molecules in filopodia at the growth cone. F-actin  
162 dynamics were observed by the motion of fluorescent actin speckles tagged with HaloTag (Fig.  
163 4A ; Video S2; Video S3; Video S4) which were observed moving along filaments toward the leading  
164 edge of the growth cone. The speed at which they moved decreased linearly with increasing  $A$ ,  
165 slowing from 3.70  $\mu\text{m}/\text{min}$  at an  $A$  of 0.06 to 2.29  $\mu\text{m}/\text{min}$  at an  $A$  of 0.99 (Fig. 4B). These data  
166 suggest that  $A$  promotes the cytoskeletal-adhesion coupling.

167 The dynamics of L1CAM-laminin binding were evaluated as grip and slip motions of  
168 L1CAM-HaloTag as shown in Fig. 4C (Video S5; Video S6; Video S7). The ratios of grip and slip  
169 states increased and decreased, respectively, with increasing  $A$  (Fig. 4D). Consistent with this, the  
170 speed at which HaloTag traveled (i.e., flow speed) decreased (Fig. 4E) while the duration spent in  
171 the grip phase increased (Fig. 4F) with increasing  $A$ . The differences between slip and grip states  
172 were proportionate to  $A$  in the range of 0.06 to 0.99.

173 L1CAM-laminin binding promotes the L1CAM grip state, transmitting the traction force to  
174 the substrate (12). With increased cytoskeletal-adhesion coupling, F-actin flow slows and the  
175 traction force transmitted to the substrate for growth cone migration increases (4, 23). Therefore,  
176 the linear associations described above support the result from the adhesion breaking test, i.e., the  
177 number of the L1CAM-laminin interactions, reflective of the adhesion strength of the growth cone,  
178 are nearly proportional to  $A$ . Conversely, the dissociation of L1CAM-laminin interactions disrupts  
179 cytoskeletal-adhesion coupling such that the force of retrograde flow is no longer transmitted to the  
180 substrate (12). The grip and slip motions observed in this study indicate that L1CAM-laminin binding  
181 is not static but changes dynamically. Thus, when the average number of L1CAM-laminin  
182 interactions between the growth cone and substrate is increased, the grip state is prolonged.

183

### 184 ***L1CAM-laminin binding results in biphasic axon outgrowth***

185 Axon outgrowth also depends on  $A$ , as shown in Fig. 5. Axon lengths were the longest ( $>170 \mu\text{m}$ )  
186 when neurons were cultured under conditions where the laminin coverage rate ( $A$ ) was between  
187 0.45 and 0.78. However, the lengths of axons from L1CAM knockdown neurons were not affected

188 by *A* (blue bars in Fig. 5B), with shorter axons overall. These data suggest not only that axon  
189 outgrowth is regulated by L1CAM binding to the laminin substrate but also that this regulated  
190 outgrowth is biphasic.

191

## 192 **Discussion**

193 In an earlier study, we measured the traction force needed to translocate axonal growth cones on  
194 a laminin-coated substrate ( $8.2 \pm 2.2$  pN/ $\mu\text{m}^2$ ) (12). The traction force is transmitted from F-actin  
195 retrograde flow; transmission is effective when the binding forces of the clutch and adhesion  
196 molecules between F-actin and substrate are higher than the traction force. The force to break the  
197 adhesion between the growth cone and substrate was on the order of kilopascals of pressure.  
198 Since the unit of force for traction (pN/ $\mu\text{m}^2$ ) corresponds to pascals (Pa = N/m<sup>2</sup>), the breaking force  
199 (>kPa) is >100 times stronger than the traction force in comparison with the average (~8 Pa). Thus,  
200 the adhesion between the growth cone and the substrate is strong enough to transmit the force of  
201 F-actin retrograde flow to the substrate.

202 The number of L1CAM-laminin interactions is an important factor for transmitting the force  
203 of F-actin retrograde flow to the substrate. With few interactions, F-actin is not coupled to the  
204 adhesive substrate through clutch molecules (e.g., shootin1a and cortactin) and L1CAM. As a  
205 result, the force of retrograde flow is not effectively transmitted to the substrate to produce sufficient  
206 traction for axon outgrowth. This was demonstrated by the short axon lengths of neurons cultured  
207 on the substrate with low laminin density. By contrast, retrograde flow slows as the laminin density  
208 increases, indicating greater cytoskeletal-adhesion coupling that promotes transmission of the  
209 force from the flow to the traction force for growth cone migration. Our results indicate that laminin  
210 concentrations resulting in an *A* between 0.45 and 0.78 are optimal for providing suitable traction  
211 force.

212 Interestingly, we observed a decrease in axon growth at a high laminin density, suggesting  
213 that excessive L1CAM-laminin binding suppresses axon outgrowth. This biphasic behavior was  
214 also reported for integrin-ligand binding (24-26). Those studies investigated the migration of  
215 fibroblast and muscle cells when using various concentrations of substrate ligands, integrin  
216 expression levels, and integrin-ligand binding affinities. Cell adhesion strength was evaluated by  
217 shear-stress flow assay and compared with the migration speed. With strong adhesion, the cells  
218 spread and extended lamellae, but the cell body did not move. The suppression of migration was  
219 attributed to the inability of cells to overcome adhesion to the substrate (26-28). For axons,  
220 outgrowth is promoted not only by the traction force at the forward side but also by detachment of  
221 the back side. Thus, the decrease in growth we observed may be attributable to a lack of  
222 detachment as a result of excessive L1CAM-laminin interactions. The cytoskeletal-adhesion  
223 coupling that generates traction force is enhanced with increasing *A*; thus the balance between the

224 traction force with the cytoskeletal-adhesion coupling and growth cone adhesion is key for  
225 regulating the axon guidance.

226 Notably, axon outgrowth was suppressed when  $A$  increased from 0.78 to 0.99, an  
227 estimated proportional increase in adhesion strength of ~20%. This result indicates that the  
228 modification of outgrowth is on the order of 10% of the modification in the adhesion strength as a  
229 result of the number of L1CAM-laminin interactions. Our data therefore suggest that these  
230 interactions are responsible for adhesion to the substrate and thus for the regulation of axon  
231 guidance. This regulation is key for growth cone migration and axon outgrowth through the  
232 extracellular matrix in brain, thereby contributing to the formation of network connections with other  
233 neurons and relevant cells.

234

### 235 **Conclusion**

236 This investigation utilized femtosecond laser impulses to quantitatively evaluate the adhesion  
237 strength between axonal growth cones and a laminin substrate. The data show that the strength of  
238 the L1CAM-laminin interactions increases with the laminin density. Notably, axon outgrowth does  
239 not increase monotonically with increased L1CAM-laminin binding but instead exhibits biphasic  
240 behavior, in which outgrowth is suppressed in the presence of high amounts of L1CAM-laminin  
241 binding. This biphasic outgrowth is regulated by altered adhesion caused by changes in the number  
242 of binding interactions on the order of 10%. These results suggest that the balance between the  
243 traction force from the cytoskeletal-adhesion coupling and growth cone adhesion is one of the keys  
244 to regulating axon guidance. Future studies on the biphasic regulation of axon outgrowth should  
245 seek to further elucidate the guidance mechanism.

246



247

## 248 **Materials and Methods**

249

### 250 ***Preparation of cell culture substrate***

251 For each experiment, a 35 mm glass-bottom dish (Matsunami, Osaka, Japan) was coated with 100  
252  $\mu\text{g/ml}$  poly-lysine (FUJIFILM WAKO Pure Chemical Corporation) at 37°C for 12 h. After washing,  
253 the plate was coated with laminin (laminin 1; FUJIFILM WAKO Pure Chemical Corporation) in  
254 phosphate-buffered saline (PBS) at 37°C for 12 h. The surfaces were washed three times with  
255 PBS. The laminin density on the dish was modified by altering the concentration of the deposited  
256 laminin solution (0.01–100  $\mu\text{g/ml}$ ). The laminin density was evaluated by coating the dish with  
257 laminin conjugated to a fluorescent dye (green fluorescent HiLyte 488; Cytoskeleton), which was  
258 observed under a confocal laser scanning microscope (Zeiss LSM710; excitation, 488 nm;  
259 emission, 510 nm). The fluorescence intensity was estimated as an area integration (15  $\times$  15  $\mu\text{m}$ )  
260 of the substrate fluorescence.

261

### 262 ***Cell culture***

263 Hippocampal neurons were prepared from embryonic day 18 rats and seeded on glass-bottom  
264 dishes. To induce axon outgrowth, neurons were cultured in neurobasal medium (Thermo Fisher  
265 Scientific) containing B-27 supplement (Thermo Fisher Scientific) and 1 mM glutamine for 3 days.  
266 All relevant aspects of the experimental procedures were approved by the Institutional Animal Care  
267 and Use Committee of Nara Institute of Science and Technology.

268

### 269 ***Femtosecond laser irradiation system***

270 The cultures were imaged on an inverted microscope (IX71; Olympus) utilizing femtosecond laser  
271 pulses from a regeneratively amplified Ti:Sapphire femtosecond laser (800  $\pm$  5 nm, 100 fs, <1  
272 mJ/pulse, 32 Hz) (Solstice Ace; Spectra-Physics). The pulse was focused near the growth cone  
273 (Fig. 1A) through a 100 $\times$  lens objective (UMPlanFI, numerical aperture [NA], 1.25; Olympus). The  
274 irradiation was controlled by a mechanical optical shutter ( $\Sigma$ -65GR; Sigma Koki). The laser pulse  
275 energy was tuned by a half-wave ( $\lambda/2$ ) plate and dual polarizers. A single femtosecond pulse (50–  
276 1,000 nJ/pulse) was applied near the growth cone, and adhesion breaking was monitored by a  
277 charge-coupled-device (CCD) camera.

278

### 279 ***Evaluation of cell damage by FM1-43 dye***

280 A cell-impermeant lipophilic dye (FM1-43; Thermo Fisher Scientific) was used to evaluate cell  
281 damage induced by the adhesion breaking process. The fluorescent dye is incorporated into inner  
282 membrane lipids after a cell membrane breaks. The dye was added to the culture medium at a

283 concentration of 2.5 mM 30 min before the laser irradiation and was then visualized using a confocal  
284 laser scanning microscope system (excitation: 473 nm, emission: 580 nm, FV300; Olympus)  
285 coupled to the inverted microscope used for laser irradiation experiments.

286

### 287 ***Impulsive force measurement system using AFM***

288 AFM was used to quantify the force needed to break the adhesion, as described previously (17).  
289 An AFM cantilever (thickness, 4.0  $\mu\text{m}$ ; length, 125  $\mu\text{m}$ ; width, 30  $\mu\text{m}$ ; force constant, 42 N/m;  
290 resonance frequency, 330 Hz in air) (TL-NCH-10; Nano World, Neuchatel, Switzerland) was  
291 attached to the AFM head (Nano Wizard 4 BioScience; JPK Instruments, Berlin, Germany) and  
292 placed in pure water on the microscope stage. The laser pulse was focused 10  $\mu\text{m}$  away from the  
293 top of the cantilever. The transient oscillation of the cantilever induced by the laser pulse irradiation  
294 was detected by an oscilloscope. The magnitude of the cantilever movement was estimated from  
295 the oscillation.

296

### 297 ***L1CAM knockdown experiment***

298 L1CAM knockdown neurons were prepared by using a Block-iT Pol II miR RNAi expression kit  
299 (Invitrogen). The targeting sequence of L1CAM miRNA #1, 5'-GTGGAGGAAGGAGAATCAGTA-  
300 3', corresponds to nucleotides 439 to 459 in the coding region of rat L1CAM was reported previously  
301 (12). Hippocampal neurons were transfected with the miRNA expression vector and incubated for  
302 20 h. The cells were then collected and cultured on the laminin-coated glass-bottom dishes. In this  
303 system, GFP is expressed with the L1CAM miRNA, enabling the growth cones of transfected cells  
304 to be visualized and monitored.

305

### 306 ***Fluorescent speckle microscopy***

307 The retrograde flow of F-actin and slip and grip motions of L1CAM were investigated by fluorescent  
308 speckle microscopy. HaloTag-actin and L1CAM-HaloTag were expressed in hippocampal neurons.  
309 To introduce HaloTag tetramethylrhodamine (TMR) to L1CAM-HaloTag and HaloTag-actin,  
310 hippocampal neurons were incubated with HaloTag TMR ligand (Promega) at a 1:1,500 dilution in  
311 L15 medium containing B27 supplement and 1 mM glutamine for 1 h at 37°C. The medium was  
312 then replaced with fresh L15 medium. The preparation method of HaloTag-actin is specified in the  
313 literature (12).

314 HaloTag-actin speckles were observed at 37°C using a fluorescence inverted microscope  
315 (Axio Observer A1; Carl Zeiss) equipped with a C-apochromat 63 $\times$  NA 1.20 lens objective (Carl  
316 Zeiss), an illumination laser (561 nm), and an EM-CCD camera (Ixon3; Andor). Fluorescent  
317 L1CAM-HaloTag speckles in growth cones were observed using total internal reflection  
318 fluorescence (TIRF) on an inverted microscope (IX81; Olympus) equipped with a TIRF lens

319 objective (UAPON 100×OTIRF NA 1.49; Olympus), an illumination laser (488 nm), and a scientific  
320 complementary metal-oxide semiconductor (sCMOS) camera (ORCA Flash4.0LT; HAMAMATSU).  
321 The flow speed of F-actin and slip speed of L1CAM were analyzed by monitoring the fluorescence  
322 signals of the HaloTags at 5 s intervals. L1CAM puncta that were visible for at least 10 s (two  
323 intervals) were analyzed; immobile ones were defined as L1CAM in stop (grip) phase, while those  
324 that flowed retrogradely were defined as in flow (slip) phase.

325

### 326 ***Evaluation of neurite length by immunofluorescence staining***

327 Axon length was evaluated by immunofluorescence imaging. Neurons were cultured for 3 days on  
328 the laminin-coated dishes, fixed with 3.7% formaldehyde in PBS overnight at 4°C, treated for 15  
329 min with 0.05% Triton X-100 in PBS at 4°C, and then incubated with 10% fetal bovine serum in  
330 PBS overnight at 4°C. The cells were then incubated with an anti-GFP antibody (Invitrogen), as  
331 described by Toriyama et al. (24), and observed with a confocal laser scanning microscope  
332 (excitation, 488 nm; emission, 510 nm; LSM 710). The lengths of all axons of 50 cells were  
333 measured for each coverage rate.

334

### 335 ***Statistical analysis***

336 Differences in means were analyzed by the paired t-test. The results of the t-test were considered  
337 significant when  $P < 0.05$ .

338

### 339 ***Acknowledgments***

340 We thank Dr. Ryohei Yasukuni and Dr. Kazunori Okano (Nara Institute of Science and Technology,  
341 Japan) for fruitful discussions.

342

### 343 ***Funding***

344 This research was supported in part by AMED under grant number 21gm0810011h0005, ACT-X  
345 under grant number JPMJAX191K, and the Foundation of Nara Institute of Science and  
346 Technology.

347

348 **References**

- 349 1. A. L. Kolodkin, M. Tessier-Lavigne, Mechanisms and molecules of neuronal wiring: a  
350 primer. *Cold Spring Harb Perspect Biol* 3 (2011).  
351
- 352 2. L. A. Lowery, D. Van Vactor, The trip of the tip: understanding the growth cone machinery.  
353 *Nat Rev Mol Cell Biol* 10, 332-343 (2009).  
354
- 355 3. K. Franze, Integrating Chemistry and Mechanics: The Forces Driving Axon Growth. *Annu*  
356 *Rev Cell Dev Biol* 36, 61-83 (2020).  
357
- 358 4. D. M. Suter, P. Forscher, Substrate-cytoskeletal coupling as a mechanism for the  
359 regulation of growth cone motility and guidance. *J Neurobiol* 44, 97-113 (2000).  
360
- 361 5. N. A. Medeiros, D. T. Burnette, P. Forscher, Myosin II functions in actin-bundle turnover in  
362 neuronal growth cones. *Nat Cell Biol* 8, 215-226 (2006).  
363
- 364 6. C. E. Chan, D. J. Odde, Traction dynamics of filopodia on compliant substrates. *Science*  
365 322, 1687-1691 (2008).  
366
- 367 7. T. Shimada et al., Shootin1 interacts with actin retrograde flow and L1-CAM to promote  
368 axon outgrowth. *J Cell Biol* 181, 817-829 (2008).  
369
- 370 8. Y. Kubo et al., Shootin1-cortactin interaction mediates signal-force transduction for axon  
371 outgrowth. *J Cell Biol* 210, 663-676 (2015).  
372
- 373 9. K. Baba et al., Gradient-reading and mechano-effector machinery for netrin-1-induced  
374 axon guidance. *Elife* 7 (2018).  
375
- 376 10. H. Hall, S. Carbonetto, M. Schachner, L1/HNK-1 carbohydrate- and beta 1 integrin-  
377 dependent neural cell adhesion to laminin-1. *J Neurochem* 68, 544-553 (1997).  
378
- 379 11. T. Esch, V. Lemmon, G. Banker, Local presentation of substrate molecules directs axon  
380 specification by cultured hippocampal neurons. *Journal of Neuroscience* 19, 6417-6426 (1999).  
381

- 382 12. K. Abe et al., Grip and slip of L1-CAM on adhesive substrates direct growth cone  
383 haptotaxis. *Proceedings of the National Academy of Sciences of the United States of America* 115,  
384 2764-2769 (2018).  
385
- 386 13. S. Gupton, C. Waterman-Storer, Spatiotemporal feedback between actomyosin and focal-  
387 adhesion systems optimizes rapid cell migration. *Cell* 125, 1361-1374 (2006).  
388
- 389 14. J. de Rooij, A. Kerstens, G. Danuser, M. Schwartz, C. Waterman-Storer, Integrin-  
390 dependent actomyosin contraction regulates epithelial cell scattering. *Journal of Cell Biology* 171,  
391 153-164 (2005).  
392
- 393 15. M. Benoit, D. Gabriel, G. Gerisch, H. Gaub, Discrete interactions in cell adhesion measured  
394 by single-molecule force spectroscopy. *Nature Cell Biology* 2, 313-317 (2000).  
395
- 396 16. M. Krieg et al., Tensile forces govern germ-layer organization in zebrafish. *Nature Cell*  
397 *Biology* 10, 429-U122 (2008).  
398
- 399 17. Y. Hosokawa, Applications of the femtosecond laser-induced impulse to cell research.  
400 *Japanese Journal of Applied Physics* 58 (2019).  
401
- 402 18. Y. Hosokawa, M. Hagiyaama, T. Iino, Y. Murakami, A. Ito, Noncontact estimation of  
403 intercellular breaking force using a femtosecond laser impulse quantified by atomic force  
404 microscopy. *Proceedings of the National Academy of Sciences of the United States of America*  
405 108, 1777-1782 (2011).  
406
- 407 19. T. Iino, M. Hagiyaama, T. Furuno, A. Ito, Y. Hosokawa, Time-Course Statistical Evaluation  
408 of Intercellular Adhesion Maturation by Femtosecond Laser Impulse. *Biophysical Journal* 111,  
409 2255-2262 (2016).  
410
- 411 20. K. Oikawa et al., Physical interaction between peroxisomes and chloroplasts elucidated by  
412 in situ laser analysis. *Nat Plants* 1, 15035 (2015).  
413
- 414 21. C. Cai et al., MG53 nucleates assembly of cell membrane repair machinery. *Nature Cell*  
415 *Biology* 11, 56-U108 (2009).  
416

- 417 22. S. Yamada, T. Iino, Y. Bessho, Y. Hosokawa, T. Matsui, Quantitative analysis of  
418 mechanical force required for cell extrusion in zebrafish embryonic epithelia. *Biology Open* 6, 1575-  
419 1580 (2017).  
420
- 421 23. M. Toriyama et al., Shootin1: a protein involved in the organization of an asymmetric signal  
422 for neuronal polarization. *Journal of Cell Biology* 175, 147-157 (2006).  
423
- 424 24. S. Palecek, J. Loftus, M. Ginsberg, D. Lauffenburger, A. Horwitz, Integrin-ligand binding  
425 properties govern cell migration speed through cell-substratum adhesiveness. *Nature* 385, 537-  
426 540 (1997).  
427
- 428 25. DiMilla PA, Barbee K, Lauffenburger DA. Mathematical model for the effects of adhesion  
429 and mechanics on cell migration speed. *Biophysical Journal* 60, 15-37 (1991).  
430
- 431 26. A. Huttenlocher, M. H. Ginsberg, A. F. Horwitz, Modulation of cell migration by integrin-  
432 mediated cytoskeletal linkages and ligand-binding affinity. *J Cell Biol* 134, 1551-1562 (1996).  
433
- 434 27. M. P. Sheetz, D. P. Felsenfeld, C. G. Galbraith, Cell migration: regulation of force on  
435 extracellular-matrix-integrin complexes. *Trends Cell Biol* 8, 51-54 (1998).  
436
- 437 28. T. Minegishi, N. Inagaki, Forces to Drive Neuronal Migration Steps. *Front Cell Dev Biol* 8,  
438 863 (2020).  
439
- 440 29. K. Hennig et al., Stick-slip dynamics of cell adhesion triggers spontaneous symmetry  
441 breaking and directional migration of mesenchymal cells on one-dimensional lines. *Sci Adv* 6,  
442 eaau5670 (2020).  
443

444 **Figures**

445

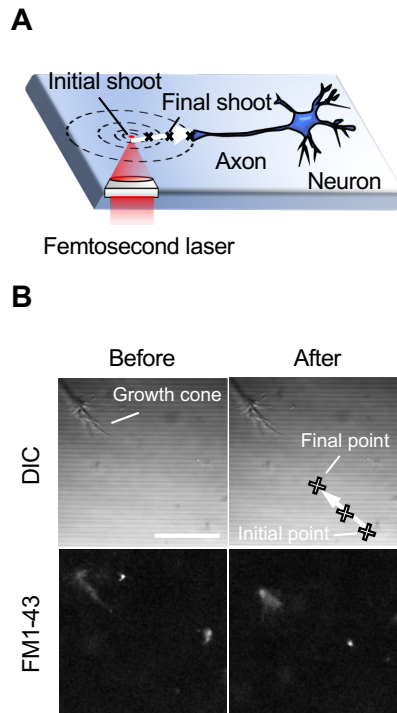

446

447 **Figure 1. Observation of adhesion breaking of an axonal growth cone by femtosecond laser-**

448 **induced impulsive force.** (A) Schematic of the spatial relation between the femtosecond laser

449 pulse and targeted axonal growth cone of a neuron cultured in a dish coated with 10  $\mu\text{g/ml}$  laminin.

450 The laser focal point was sequentially moved closer to the growth cone, as indicated by an arrow.

451 (B) Representative results of adhesion breaking of a growth cone. Top and bottom panels are

452 differential interference contrast (DIC) and fluorescence images before (left) and after (right) the

453 final pulse irradiation, which induces the detachment of the growth cone. Before the final irradiation,

454 the pulse was sequentially focused closer to the growth cone, indicated as cross points (laser focal

455 point) on the arrowed line in the top right image. The white silhouettes in the bottom fluorescence

456 microphotographs are weak fluorescence from FM1-43 dye used to evaluate damage of the growth

457 cone. Scale bar, 10  $\mu\text{m}$ .

458

459

460

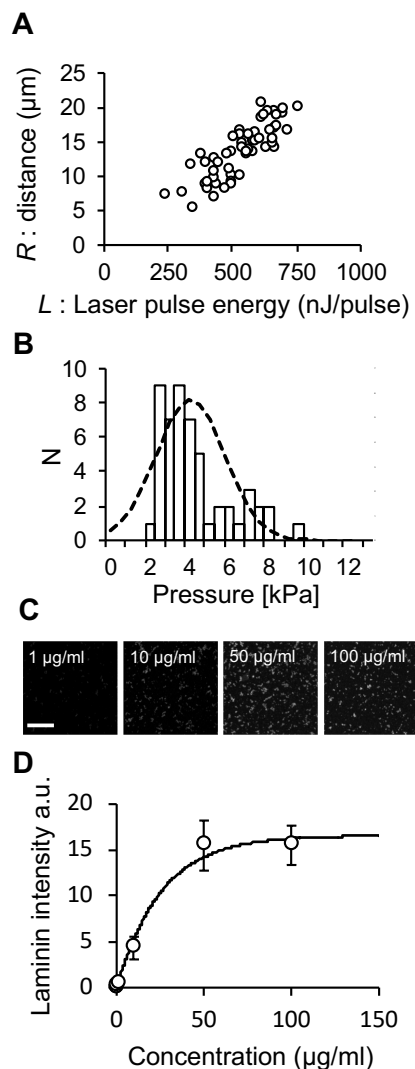

461

462

463 **Figure 2. Quantitative evaluation of breaking force for growth cone adhesion by using**  
464 **femtosecond laser impulsive force.** (A) Pulse energy  $L$  dependence of threshold distance  $R$  to  
465 break the growth cone adhesion on a glass substrate coated with a 10  $\mu\text{g/ml}$  laminin solution,  
466 corresponding to an  $A$  of 0.45 (see Eq. [4]).  $n = 36$ . (B) Histogram of the adhesion breaking  
467 threshold. The vertical axis  $N$  is number of cells. The threshold was calculated independently by  
468 substituting data from panel A into Eq. [2]. (C) Images of fluorescent dye-conjugated laminin on the  
469 substrate. Concentrations of the laminin solution used for the coating are indicated at the top. Scale  
470 bar, 10  $\mu\text{m}$ . (D) Fluorescence intensity as a function of the laminin concentration. The fluorescence  
471 intensities were measured on substrates coated with laminin solutions with concentrations of 0.01,



472 0.1, 1, 10, 50, and 100 µg/ml. The fitting curve was calculated by Eq. [3], where  $I_{\max} = 25.5$  and  $k =$   
473 16.6.  $n = 50$  for each concentration. Data are means  $\pm$  SDs from three independent experiments.  
474

475

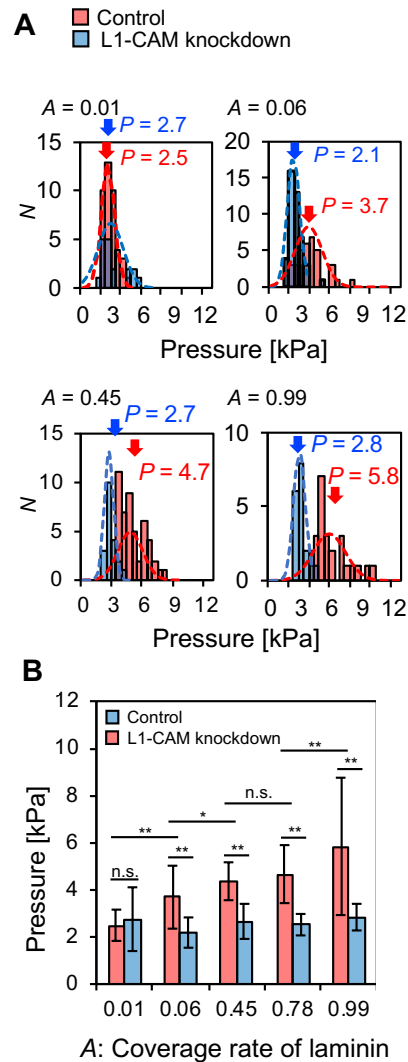

476

477

478 **Figure 3. Adhesion breaking of growth cone on a laminin-coated substrate.**

479 (A) Representative results of the adhesion breaking threshold. The coverage rate of laminin (A) is  
 480 indicated at the top. The vertical axis *N* is number of cells. Red and blue histograms are for control  
 481 neurons and L1CAM knockdown neurons. (B) Means and SDs of the breaking threshold. Control  
 482 neurons: *n* = 41, 35, 36, 12, and 25 signals for *A* = 0.01, 0.06, 0.45, 0.78, and 0.99, respectively.  
 483 L1CAM knockdown neurons: *n* = 18, 44, 34, 20, and 19 signals for *A* = 0.01, 0.06, 0.45, 0.78, and  
 484 0.99, respectively. \**p* < 0.05, \*\**p* < 0.01 (two-tailed Student's *t* test), n.s., not significant.

485

486

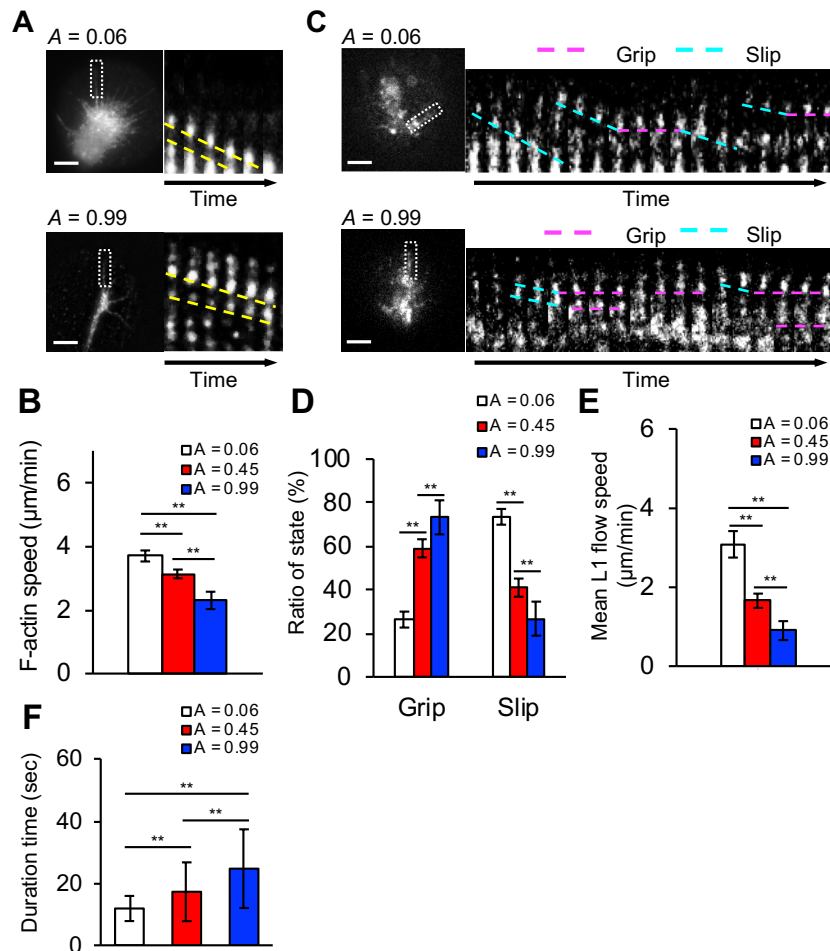

487

488

489 **Figure 4. Molecular dynamics of F-actin and L1CAM in the axonal growth cone detected by**

490 **fluorescence speckle microscopy.** (A) Fluorescence speckle images of the HaloTag-actin in a

491 filopodium extended from an axonal growth cone. The coverage rate of laminin (A) is indicated at

492 the top. Kymographs (right) depict HaloTag-actin behavior in boxed region in the image on the left.

493 Slope of the yellow dashed line corresponds to retrograde flow speed of the F-actin. Time interval

494 between frames, 5 s. Scale bar, 5 μm. (B) Retrograde flow speed of F-actin. *n* = 125, 160, and 130

495 signals for *A* = 0.06, 0.45, and 0.99, respectively. (C) Fluorescence speckle images of L1CAM-

496 HaloTag in a filopodium. Kymographs (right) depict L1CAM-HaloTag behavior in a boxed region in

497 the image on the left. Dashed pink and blue lines connect L1CAM in grip and slip states,

498 respectively. Time interval between frames, 5 s. Scale bar, 5 μm. Ratios (D) and flow speeds (E)

499 of the grip and slip states of L1CAM-HaloTag in filopodia obtained from the kymograph analyses.

500 *n* = 261, 450, and 197 signals for *A* = 0.06, 0.45, and 0.99, respectively. (E) Flow speed of L1CAM-

501 HaloTag in the slip state. The speed corresponds to slopes of dashed blue lines in panel C. (F)

502 Durations of L1-HaloTag grip. White, red, and blue bars represent data for  $A = 0.06, 0.45,$  and  $0.99,$   
503 respectively. Data are means  $\pm$  SDs;  $**p < 0.01.$

504

505

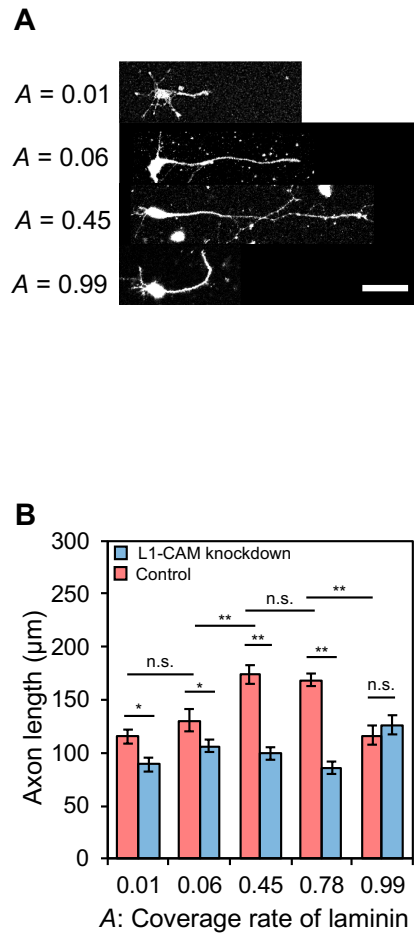

507

508

509 **Figure 5. Elongation of neurites on laminin-coated substrate.**

510 (A) Confocal images of neurons visualized with a GFP antibody. The coverage rate of laminin (A)

511 is indicated on the left. Scale bar, 100 µm. (B) Mean values and SDs of axon length. Control

512 neurons:  $n = 91, 28, 79, 60,$  and  $71$  signals for  $A = 0.01, 0.06, 0.45, 0.78,$  and  $0.99,$  respectively;

513 L1CAM knockdown neurons:  $n = 43, 49, 73, 103,$  and  $48$  signals for  $A = 0.01, 0.06, 0.45, 0.78,$  and

514  $0.99,$  respectively. \* $p < 0.05,$  \*\* $p < 0.01.$  n.s., not significant.

515
